# Supplementary material for: A surface topography assisted droplet manipulation platform for biomarker detection and pathogen identification
Source: Royal Society of Chemistry journal article supplement (doi:10.1039/c0lc00296h), 2010-11-03
Supplement: c0lc00296h.pdf [file c0lc00296h.pdf]

## A Surface Topography Assisted Droplet Manipulation Platform for Biomarker Detection and Pathogen Identification

Yi Zhang,<sup>a</sup> Seungkyung Park,<sup>b</sup> Kelvin Liu,<sup>a</sup> Jennifer Tsuan,<sup>a</sup> Samuel Yang<sup>b</sup> and Tza-Huei Wang<sup>\*c</sup>

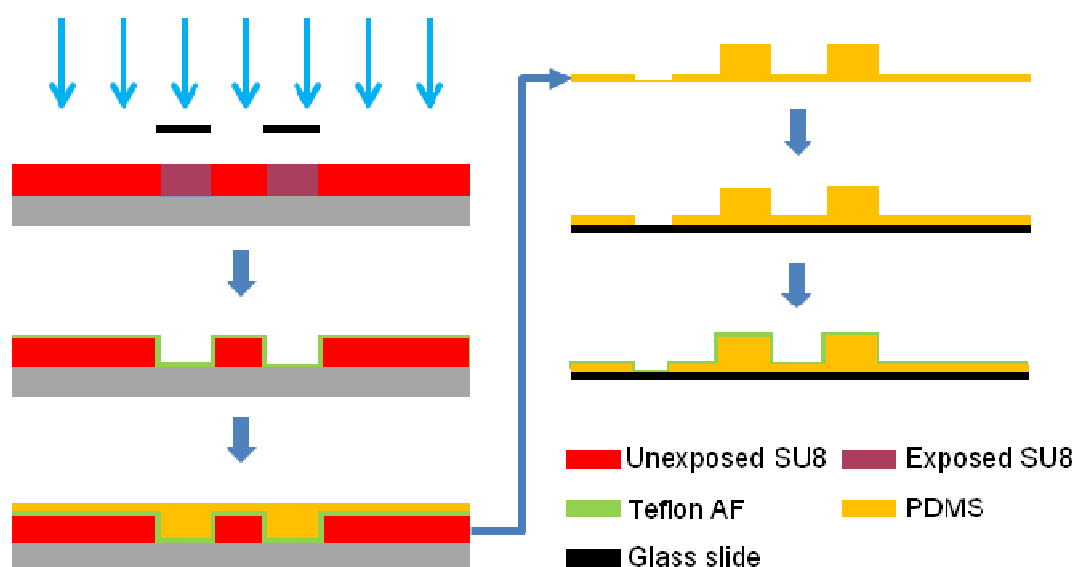

**Supplementary Fig. S1:** Fabrication process flow. The photoresist of  $\sim 600\mu\text{m}$  thick is spun on by multiple spin coating. The features are lithographically patterned and dip-coated with Teflon AF after the hard bake. PDMS is spun onto the mold and cured at  $80^\circ\text{C}$  after which the PDMS membrane is peeled off and the reaction basins are punched using a 4mm hollow puncher. At last, the PDMS membrane is rolled onto the glass coverslip and dip-coated with Teflon AF. Alternatively, the mold can be fabricated by micromachining on a PTFE substrate.

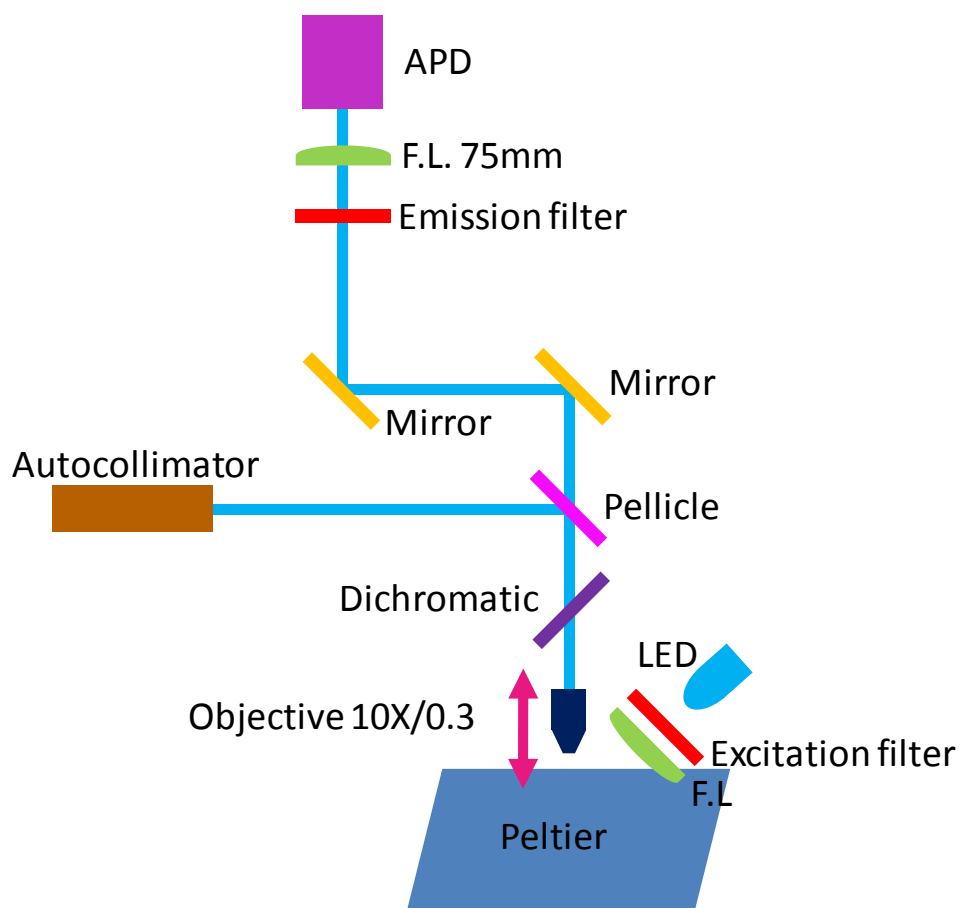

**Supplementary Fig. S2:** The optical setup configuration. F.L.=focusing lens. A 480/BP40 excitation filter and a 520/BP40 emission filter were used to accommodate the fluorophores used in this study.

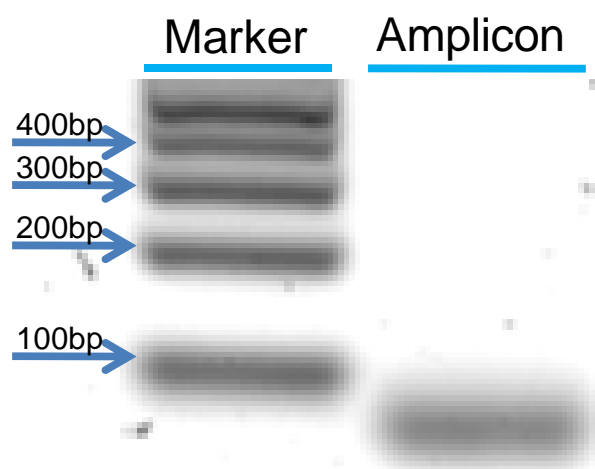

**Supplementary Fig. S3:** PCR Amplicon of Rsf-1 gene is collected and run on a 2% agarose gel at 8V/cm for 90 mins.

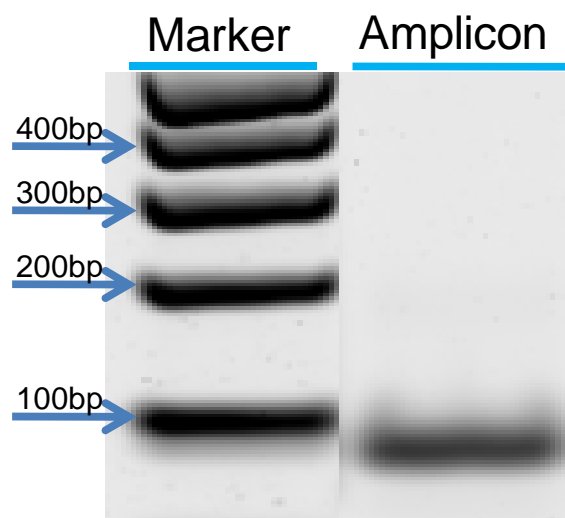

**Supplementary Fig. S4:** HDA Amplicon of Rsf-1 gene is collected and run on a 2% agarose gel at 8V/cm for 90 mins.

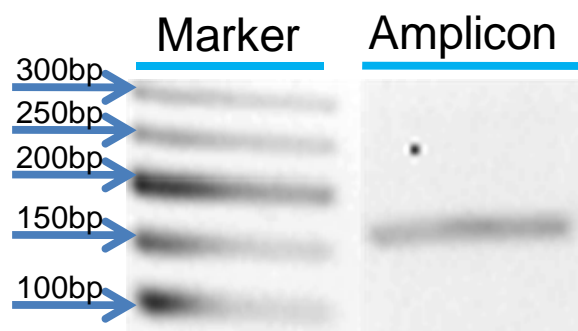

**Supplementary Fig. S5:** PCR Amplicon of E.coli 16S gene is collected and run on a 2% agarose gel at 8V/cm for 90 mins.

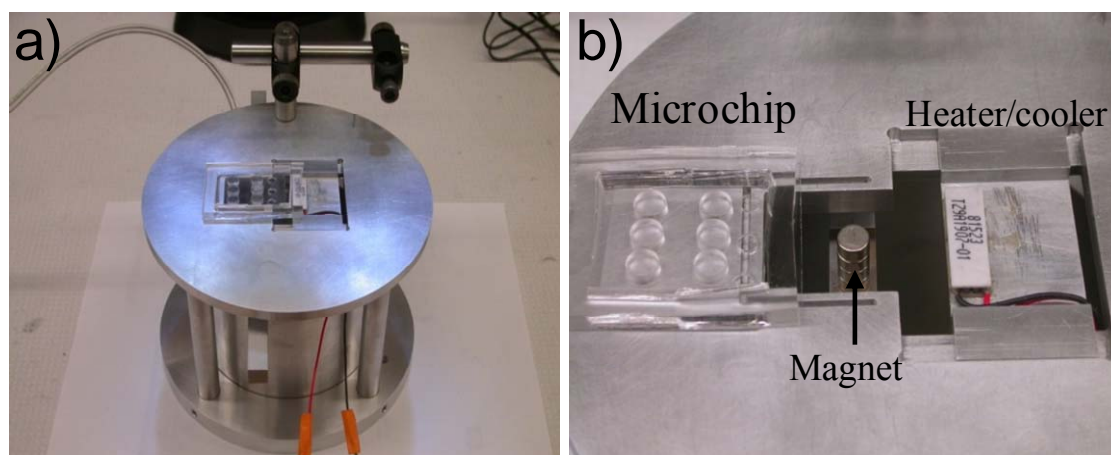

**Supplementary Fig. S6:** Photographs of the actual device. a) The overall view. A T-bar is mounted to hold the temperature sensor. b) The zoomed view featuring the microchip, the magnet holder bar and the slider with the micro heater/cooler.

**Supplementary video:** Demonstration of manipulating droplets with the assistance of the surface topographic features.
